# Supplementary material for: Negative differential resistance observed on the charge density wave of a transition metal dichalcogenide
Source: Royal Society of Chemistry journal article supplement (doi:10.1039/c9nr07857f), 2019-01-01
Supplement: c9nr07857f1.pdf [file c9nr07857f1.pdf]

## Supporting Information

# Negative Differential Resistance Observed on the Charge Density Wave of a Transition Metal Dichalcogenide

*Adina Luican-Mayer<sup>1+3\*</sup>, Yuan Zhang<sup>1+</sup>, Andrew DiLullo<sup>1</sup>, Yang Li<sup>1,2</sup>, Brandon Fisher<sup>1</sup>, Sergio E. Ulloa<sup>2</sup>, and Saw-Wai Hla<sup>1,2,\*</sup>*

<sup>1</sup>Center for Nanoscale Materials, Argonne National Laboratory, 9700 South Cass Ave., Argonne, Illinois 60439, United States.

<sup>2</sup>Nanoscale and Quantum Phenomena Institute, and Department of Physics & Astronomy, Ohio University, Athens, Ohio 45701, United States.

<sup>3</sup>Department of Physics, University of Ottawa, 150 Louis Pasteur Private, Ottawa, Canada.

KEYWORDS: Charge Density Wave, Scanning Tunneling Microscopy, Negative Differential Resistance, Transition Metal Dichalcogenides

## Corresponding Author

\* Corresponding authors email: hla@ohio.edu ; luican-mayer@uottaw.ca

## Present Addresses

<sup>+</sup>Current Address: Department of Physics, Old Dominion University, 4600 Elkhorn Ave, Norfolk, VA 23529, USA.

The submitted manuscript has been created by UChicago Argonne, LLC, Operator of Argonne National Laboratory ("Argonne"). Argonne, a U.S. Department of Energy Office of Science laboratory, is operated under Contract No. DE-AC02-06CH11357. The U.S. Government retains for itself, and others acting on its behalf, a paid-up nonexclusive, irrevocable worldwide license in said article to reproduce, prepare derivative works, distribute copies to the public, and perform publicly and display publicly, by or on behalf of the Government.

### S1. Stacking or CDW in adjacent 1T-TaS<sub>2</sub> layers

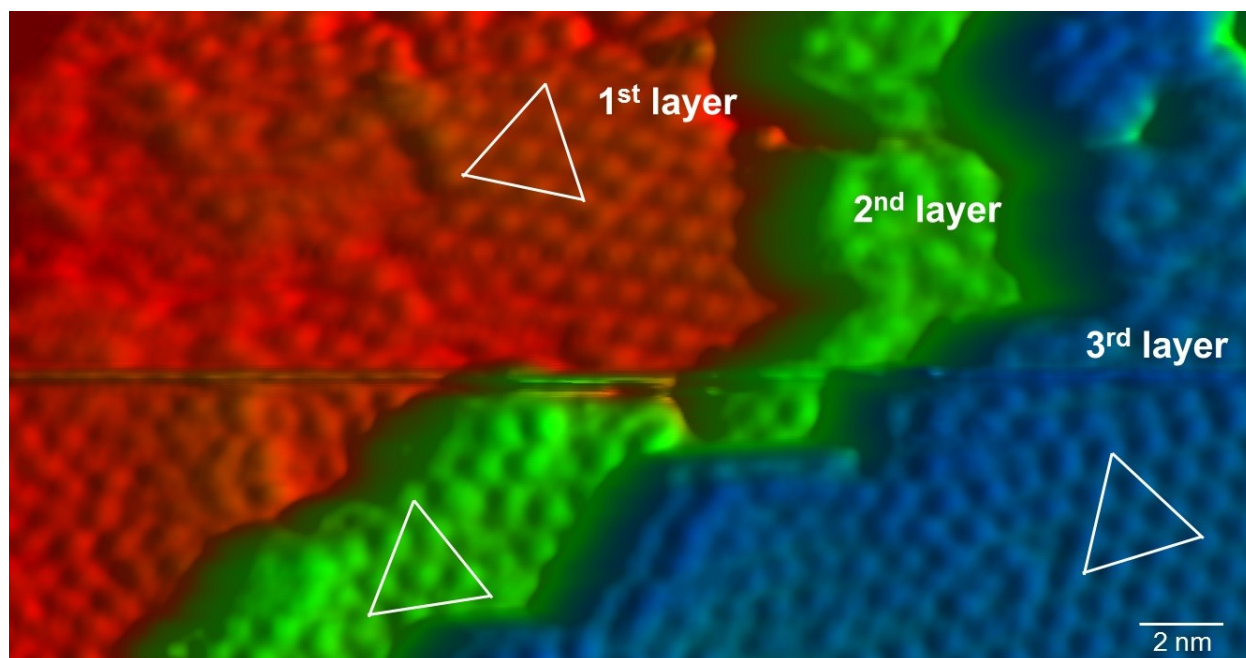

**Figure S1.** STM image of 1T-TaS<sub>2</sub> multi-layers acquired at the edge of the sample shows CDW domains. The triangles indicate different ordering [Imaging parameters:  $V_t = 1\text{V}$ ,  $I_t = 1\text{ nA}$ ].

## S2. Creation of tip-induced local defects

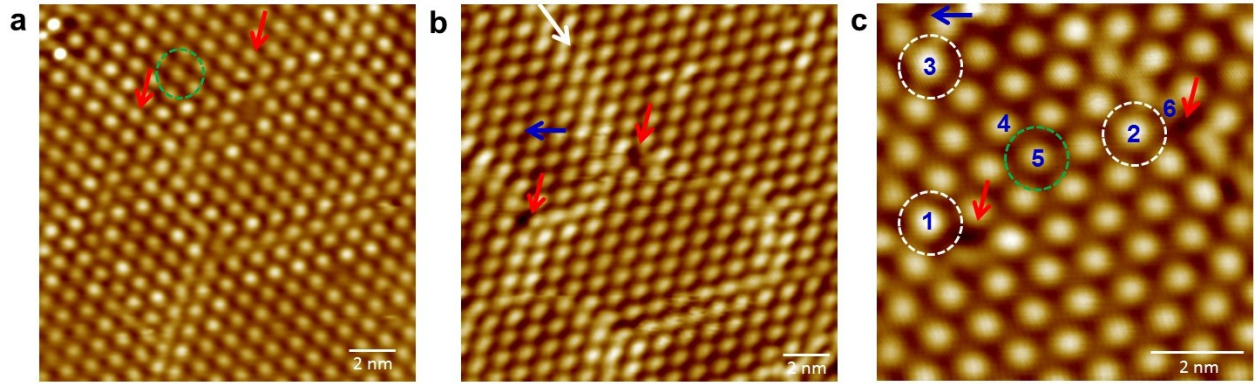

**Figure S2.** ***a***, An STM image of a 1T-TaS<sub>2</sub> with the CDW lattice. ***b***, The STM image after creating two point defects at the place shown with red arrows in '*a*'. The brighter regions (indicated with a white arrow) are stacking faults caused by the manipulation. ***c***, A zoom in STM image after creating another defect at the blue arrow location in '*b*'. White ovals indicate the changes in electronic structure of the CDW top sites that exhibit NDR. The green oval in '*a*' and '*c*' indicate the same CDW top site before and after manipulation where the  $dI/dV$  spectra shown in Fig. 3b are acquired. [Imaging parameters:  $V_t = 1V$ ,  $I_t = 0.2$  nA].

### S3. 1T-TaS<sub>2</sub> region of the dI/dV movie

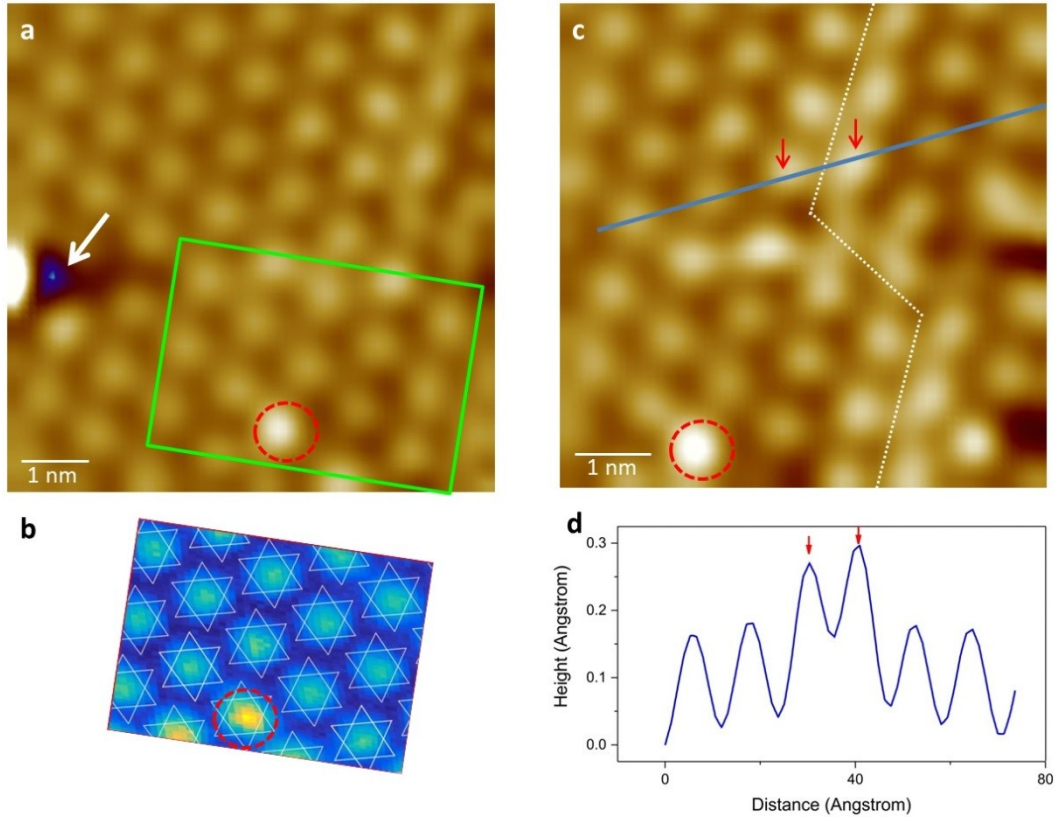

**Figure S3.** **a**, An STM image of 1T-TaS<sub>2</sub> region after tip sample mechanical contact at left (indicated with the white arrow). **b**, dI/dV maps are acquired at the green rectangle region. **c**, An STM image of the same 1T-TaS<sub>2</sub> region where a CDW domain is indicated with the white dashed line. **d**, A line profile across the blue line in 'c' shows a height difference appeared at the domain wall (indicated with red arrows in 'c' and 'd'). The red oval in 'a', 'b' and 'c' marks the position of a bright protrusion (electronic defect) used here as a landmark. [Imaging parameters:  $V_t = 1V$ ,  $I_t = 1\text{ nA}$ ]

#### S4. $dI/dV$ spectroscopy of individual atoms

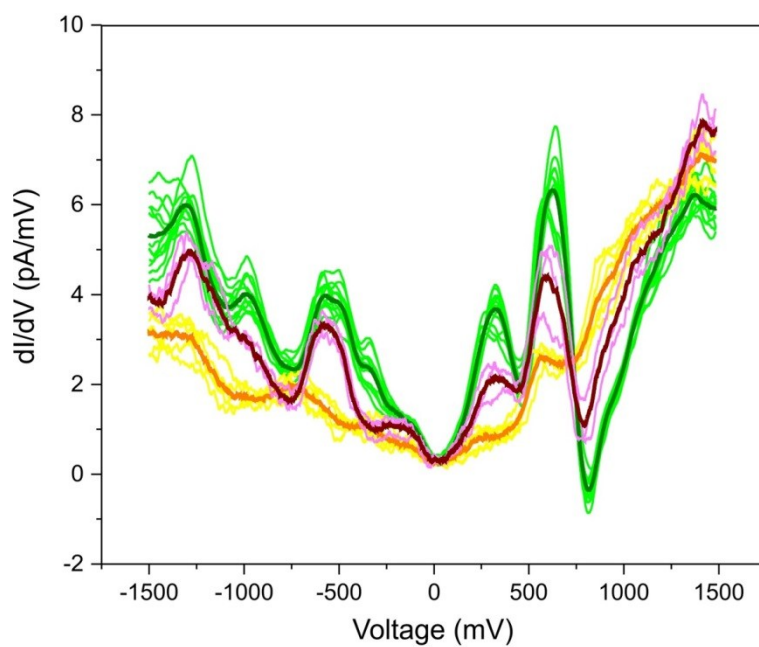

**Figure S4.**  $dI/dV$  spectra acquired over the 'a' (green), 'b' (pink) and 'c' (yellow) atom sites of the Star-of-David structure. The average spectrum of each atom type; green for 'a', brown for 'b' and orange for 'c' atoms.

### S5. Tip height dependent $dI/dV$ spectroscopy

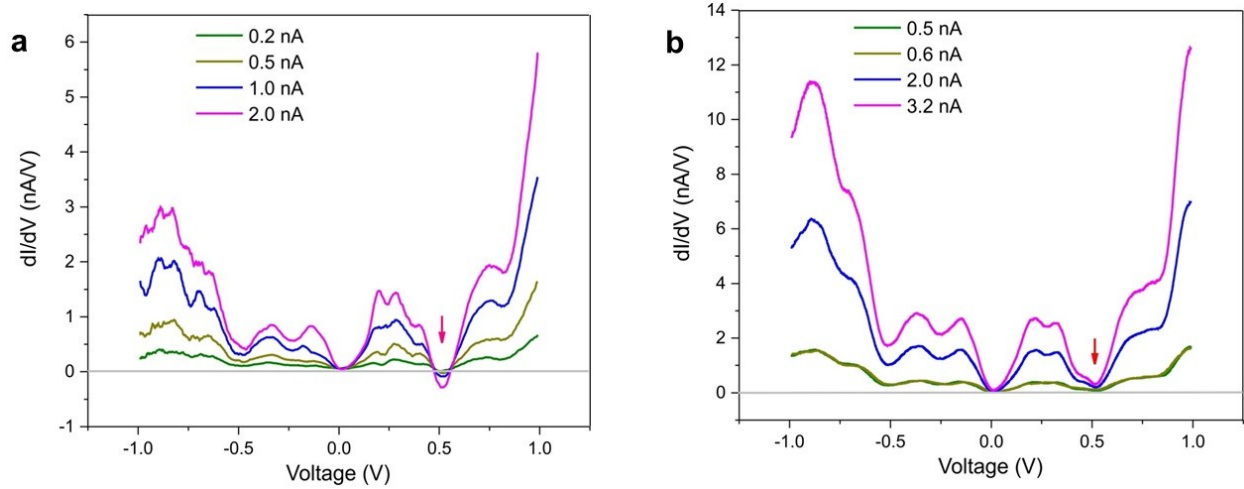

**Figure S5.**  $dI/dV$  spectroscopic data measured at different set-currents at a fixed bias of 1V. The increase in tunnelling current represents an approaching tip towards the surface. **a**,  $dI/dV$  curves measured at the different set tunnelling currents on the CDW top site (a defect site as shown in Fig. 2a) reveal an increasing NDR at  $\sim 0.5$  V (indicated with a red arrow) by reducing the tip height. **b**,  $dI/dV$  curves measured at a CDW top site that does not show NDR. Here, the  $dI/dV$  curves remain at positive values at  $\sim 0.5$  V by approaching the tip to the surface (red arrow location).
